# Supplementary material
Source: HighWire-hosted journal article supplement (https://jme.bmj.com/content/48/3/175)
Supplement: inline-supplementary-material-1 [file inline-supplementary-material-1.pdf]

**Specific Interview Questions**

- complementing the key questions (cf. interview guide)
- pool, questions selected according to expertise of interview partner and to course of interview

**General questions on DNAR**

*How is the DNAR status defined?*

*What general characteristics do DNAR patients have in common?*

*Does the conversation with the patient include the topic of surrogate decision-making?*

*Who should initiate a conversation about resuscitation with the patient?*

*How do you explain CPR to the patient?*

*Which patients are considered to have low chances to survive CPR or to profit in any way from it?*

*When (with a view to patient pathway from admission to discharge) is a DNAR decision typically made?*

*How happens when a DNAR patient has a myocardial infarct?*

*Are there different levels of DNAR status?*

*Does the DNAR status differentiate between lifesaving and life supporting measures?*

*Is a DNAR status still valid if the cardiac arrest resulted from an iatrogenic complication?*

*Is the DNAR status of a referred patient reviewed?*

*Is a DNAR order issued outside the hospital still valid in hospital and vice versa?*

*At which point are life-saving measures considered futile?*

*What is the relevance of DNAR orders in palliative care?*

*Do all patients in palliative care have a DNAR order?*

*Once a DNAR decision has been made, are other lifesaving procedures considered inappropriate as well?*

*How are medical personnel trained in the DNAR decision making process?*

*Do physicians ask for training in DNAR decision-making?*

**Healthcare professional - patient**

*(How) is a patient's mental state considered in the DNAR decision-making process?*

*How is a "competent" and "informed" patient defined?*

*If a patient is not involved in the DNAR decision-making process, according to which criteria was he excluded?*

*Which barriers typically render an involvement of a patient in the DNAR decision-making process more difficult?*

*How are cognitively impaired patients involved in a DNAR decision making process?*

*How do you explain patients the uncertainty of a prognosis?*

*Do you routinely discuss the topic of iatrogenic cardiac arrest with the patient?*

*Do you think that the religious orientation of the patient influences his/her decision regarding his/her own DNAR status?*

*How often do you talk to the patient before a DNAR decision is reached?*

*How do patients react to the topic "DNAR"?*

*How is it ensured that the information regarding the DNAR status of a patient is passed on to the treating staff?*

*Do physicians feel reluctant to raise the CPR issue with the patient?*

*Which factors trigger an initial conversation resp. reevaluation of a patient's DNAR status?*

#### **Physician – interprofessional team**

*How many people are involved in a typical DNAR decision process?*

*How often are DNAR decisions discussed in the team?*

*Anhand von welchen Kriterien werden DNAR Entscheide im Team diskutiert?*

*Which kind of DNAR decisions are discussed in the team?*

*How does a clinical team reach a consensual decision regarding the DNAR status of a patient?*

*Does the decision process get documented?*

*Is the expected quality of life after a reanimation procedure relevant to determine a DNAR status decision?*

*Is the existing quality of life important for the DNAR decision making process?*

*How do physicians assess the expected and lived quality of life of the patient?*

*Does a DNAR decision have influence on the (nursing) care given to the patient?*

*Is a DNAR order related to an eventual switch in therapy towards palliative medicine?*

*How do physician weigh different factors (prognosis, quality of life, age, diagnosis, cognitive status, decision-making capability) when a patient's CPR status is discussed within the team?*

*Are Prognosis after Resuscitation (PAR) or Pre-arrest Morbidity (PAM) scores used for such a decision? (Or any other score?)*

*How does a patient's diagnosis influence the DNAR decision-making process?*

*If a DNAR patient needs to be treated surgically, does an eventual DNAR status have to be annulled for the surgery?*

*How often are experienced physician consulted during a DNAR decision-making process?*

*Within the interprofessional treatment team, who typically starts the discussion about a DNAR decision?*

*If a DNAR decision is nonconsensual, how good is the compliance of the staff disagreeing with that decision?*
