# Supplementary material
Source: HighWire-hosted journal article supplement (https://jme.bmj.com/content/48/3/175)
Supplement: inline-supplementary-material-2 [file inline-supplementary-material-2.pdf]

## Interview Guide Semi-Structured Expert Interviews (English version)

### Interview partner

M / F

Health profession

Interview date

Location

### Introduction and information about purpose

Personal introduction and welcome (Interviewer)

Expected length: 30 – 45 minutes

Primary goal: We aim to better understand how DNAR status decisions are currently made at this university hospital, what challenges you perceive and how you think about potential future developments, specifically AI-based decision support

### Confirm consent and data protect

In our previous correspondence, you have received written information about the study, and you consented to be interviewed. Any questions?

- Repeat key information about recording, pseudonymization, transcription and analysis. Quotes may be published but will not be identifiable.

Are you still fine with the interview going ahead?

You are free to not answer questions or to end the interview anytime you please.

- Thank interview partner for willingness to participate.

I will now start recording.

### Focus areas and key questions

Can you tell me a bit about how the determination of patients' resuscitation status relates to your work?

- What does it mean for a patient to be DNAR at your hospital?
- What general characteristics do DNAR patients have in common in your experience?
- What does it mean for a patient to be DNAR at your hospital?
- What general characteristics do DNAR patients have in common in your experience?

How do DNAR decision-making processes work at hospital XXX?

- Do you routinely discuss DNAR decisions with your patients?
- Do you follow a specific protocol for reaching DNAR decisions with a patient?

- When do you initiate a DNAR discussion with the patient resp. the surrogate?
- How is the decision process documented?

What challenges do you perceive with a view to DNAR?

- What triggers a reevaluation of a patient's DNAR status?
- If patients have not been involved in the DNAR decision-making process, for what reasons were they not included?
- When do DNAR decisions get the subject of discussion within the care team?
- Within the care team, who typically starts the discussion about a DNAR decision?
- How would you describe the participation of patients in DNAR status discussions?

Do you see any role for AI in supporting decisions around resuscitation in your hospital?

- How would you think about the use of an AI-based tool that supports decision-making by offering predictions about what the patient would likely have wanted (in case you cannot talk to the patient)?
- What challenges and limitations do you see for AI in decision-making?
- How could AI fit into your decision-making processes?

**Specific questions (asked in accordance with particular expertise of interview partner)**

Cf. separate document ("Specific Interview Questions")
